# Supplementary material
Source: ML conference proceedings conference paper supplement (https://openaccess.thecvf.com/content/CVPR_2020/html/Xu_AANet_Adaptive_Aggregation_CVPR_2020_paper.html)
Supplement: Supplementary file 1 [file Xu_AANet_Adaptive_Aggregation_CVPR_2020_supplemental.pdf]

# AANet: Adaptive Aggregation Network for Efficient Stereo Matching

## Supplementary Material

Haofei Xu Juyong Zhang\*  
 University of Science and Technology of China  
 xhf@mail.ustc.edu.cn, juyong@ustc.edu.cn

In this supplementary document, we briefly review traditional cross-scale cost aggregation algorithm [1] to make this paper self-contained.

For cost volume  $\mathbf{C} \in \mathbb{R}^{D \times H \times W}$ , [1] reformulates the local cost aggregation from an optimization perspective:

$$\tilde{\mathbf{C}}(d, \mathbf{p}) = \arg \min_z \sum_{\mathbf{q} \in N(\mathbf{p})} w(\mathbf{p}, \mathbf{q}) \|z - \mathbf{C}(d, \mathbf{q})\|^2, \quad (1)$$

where  $\tilde{\mathbf{C}}(d, \mathbf{p})$  denotes the aggregated cost at pixel  $\mathbf{p}$  for disparity candidate  $d$ , pixel  $\mathbf{q}$  belongs to the neighbors  $N(\mathbf{p})$  of  $\mathbf{p}$ , and  $w$  is the weighting function to measure the similarity of pixel  $\mathbf{p}$  and  $\mathbf{q}$ . The solution of this weighted least square problem (1) is

$$\tilde{\mathbf{C}}(d, \mathbf{p}) = \sum_{\mathbf{q} \in N(\mathbf{p})} w(\mathbf{p}, \mathbf{q}) \mathbf{C}(d, \mathbf{q}). \quad (2)$$

Thus, different local cost aggregation methods can be reformulated within a unified framework.

Without considering multi-scale interactions, the multi-scale version of Eq. (1) can be expressed as

$$\tilde{\mathbf{v}} = \arg \min_{\{z^s\}_{s=1}^S} \sum_{s=1}^S \sum_{\mathbf{q}^s \in N(\mathbf{p}^s)} w(\mathbf{p}^s, \mathbf{q}^s) \|z^s - \mathbf{C}^s(d^s, \mathbf{q}^s)\|^2, \quad (3)$$

where  $\mathbf{p}^s$  and  $d^s$  denote pixel and disparity at scale  $s$ , respectively, and  $\mathbf{p}^{s+1} = \mathbf{p}^s / 2$ ,  $d^{s+1} = d^s / 2$ ,  $\mathbf{p}^1 = \mathbf{p}$  and  $d^1 = d$ . The aggregated cost at each scale is denoted as

$$\tilde{\mathbf{v}} = [\tilde{\mathbf{C}}^1(d^1, \mathbf{p}^1), \tilde{\mathbf{C}}^2(d^2, \mathbf{p}^2), \dots, \tilde{\mathbf{C}}^S(d^S, \mathbf{p}^S)]^T. \quad (4)$$

The solution of Eq. (3) is obtained by performing cost aggregation at each scale independently:

$$\tilde{\mathbf{C}}^s(d^s, \mathbf{p}^s) = \sum_{\mathbf{q}^s \in N(\mathbf{p}^s)} w(\mathbf{p}^s, \mathbf{q}^s) \mathbf{C}^s(d^s, \mathbf{q}^s), \quad s = 1, 2, \dots, S. \quad (5)$$

By enforcing the inter-scale consistency on the cost volume, we can obtain the following optimization problem:

$$\hat{\mathbf{v}} = \arg \min_{\{z^s\}_{s=1}^S} \left( \sum_{s=1}^S \sum_{\mathbf{q}^s \in N(\mathbf{p}^s)} w(\mathbf{p}^s, \mathbf{q}^s) \|z^s - \mathbf{C}^s(d^s, \mathbf{q}^s)\|^2 + \lambda \sum_{s=2}^S \|z^s - z^{s-1}\|^2 \right), \quad (6)$$

where  $\lambda$  is a parameter to control the regularization strength, and  $\hat{\mathbf{v}}$  is denoted as

$$\hat{\mathbf{v}} = [\hat{\mathbf{C}}^1(d^1, \mathbf{p}^1), \hat{\mathbf{C}}^2(d^2, \mathbf{p}^2), \dots, \hat{\mathbf{C}}^S(d^S, \mathbf{p}^S)]^T. \quad (7)$$

The optimization problem (6) is convex and can be solved analytically (see details in [1]). The solution can be expressed as

$$\hat{\mathbf{v}} = P\tilde{\mathbf{v}}, \quad (8)$$

where  $P$  is an  $S \times S$  matrix. That is, the final cost volume is obtained through the adaptive combination of the results of cost aggregation performed at different scales.

Inspired by this conclusion, we design our cross-scale cost aggregation architecture as

$$\hat{\mathbf{C}}^s = \sum_{k=1}^S f_k(\tilde{\mathbf{C}}^k), \quad s = 1, 2, \dots, S, \quad (9)$$

where  $f_k$  is defined by neural network layers.

## References

- [1] Kang Zhang, Yuqiang Fang, Dongbo Min, Lifeng Sun, Shiqiang Yang, Shuicheng Yan, and Qi Tian. Cross-scale cost aggregation for stereo matching. In *Proceedings of the IEEE Conference on Computer Vision and Pattern Recognition*, pages 1590–1597, 2014. 1

\*Corresponding author
